# Supplementary material for: A RAD51 assay feasible in routine tumor samples calls PARP inhibitor response beyond BRCA mutation
Source: PubMed Central journal article supplement (PMC6284440; doi:10.15252/emmm.201809172), 2018-10-30
Supplement: EMMM-10-e9172-s002.pdf [file EMMM-10-e9172-s002.pdf]

## Expanded View Figures

**Figure EV1. Analysis of *PALB2* mutation in PDX093; RAD51 assay scoring and validation.**

- A Sanger sequencing reverse plots of DNA and RNA from PDX093 showing 1 nt (T) insertion in one *PALB2* allele (*PALB2* c.886dupA).
- B Flow diagram of the RAD51 scoring criteria and quality controls.
- C Quantification of geminin-positive cells with RAD51 foci (Mann–Whitney *U*-test) following treatment with vehicle and olaparib in PARPi-sensitive (CR/PR) versus PARPi-resistant (PD) PDXs.
- D Pearson correlation between the RAD51 score (percentage of RAD51 (+)/Geminin (+) cells, assessed in untreated FFPE tumor samples) and the percentage of tumor volume change in olaparib-treated tumors from PDX cohort-1. Each dot represents one PDX model. Error bars indicate SEM from independent tumors ( $n \geq 3$ ) treated with olaparib.
- E Quantification of geminin-positive cells (paired *t*-test in vehicle- versus olaparib-treated tumors; unpaired *t*-test in CR/PR versus PD tumors) following treatment with vehicle and olaparib in PARPi-sensitive (CR/PR) versus PARPi-resistant (PD) PDXs.
- F Spearman correlation of the percentage of RAD51 (+)/Geminin (+) cells in PDX cohort-1 assessed with two different antibodies against RAD51 both in vehicle- and olaparib-treated PDX samples.

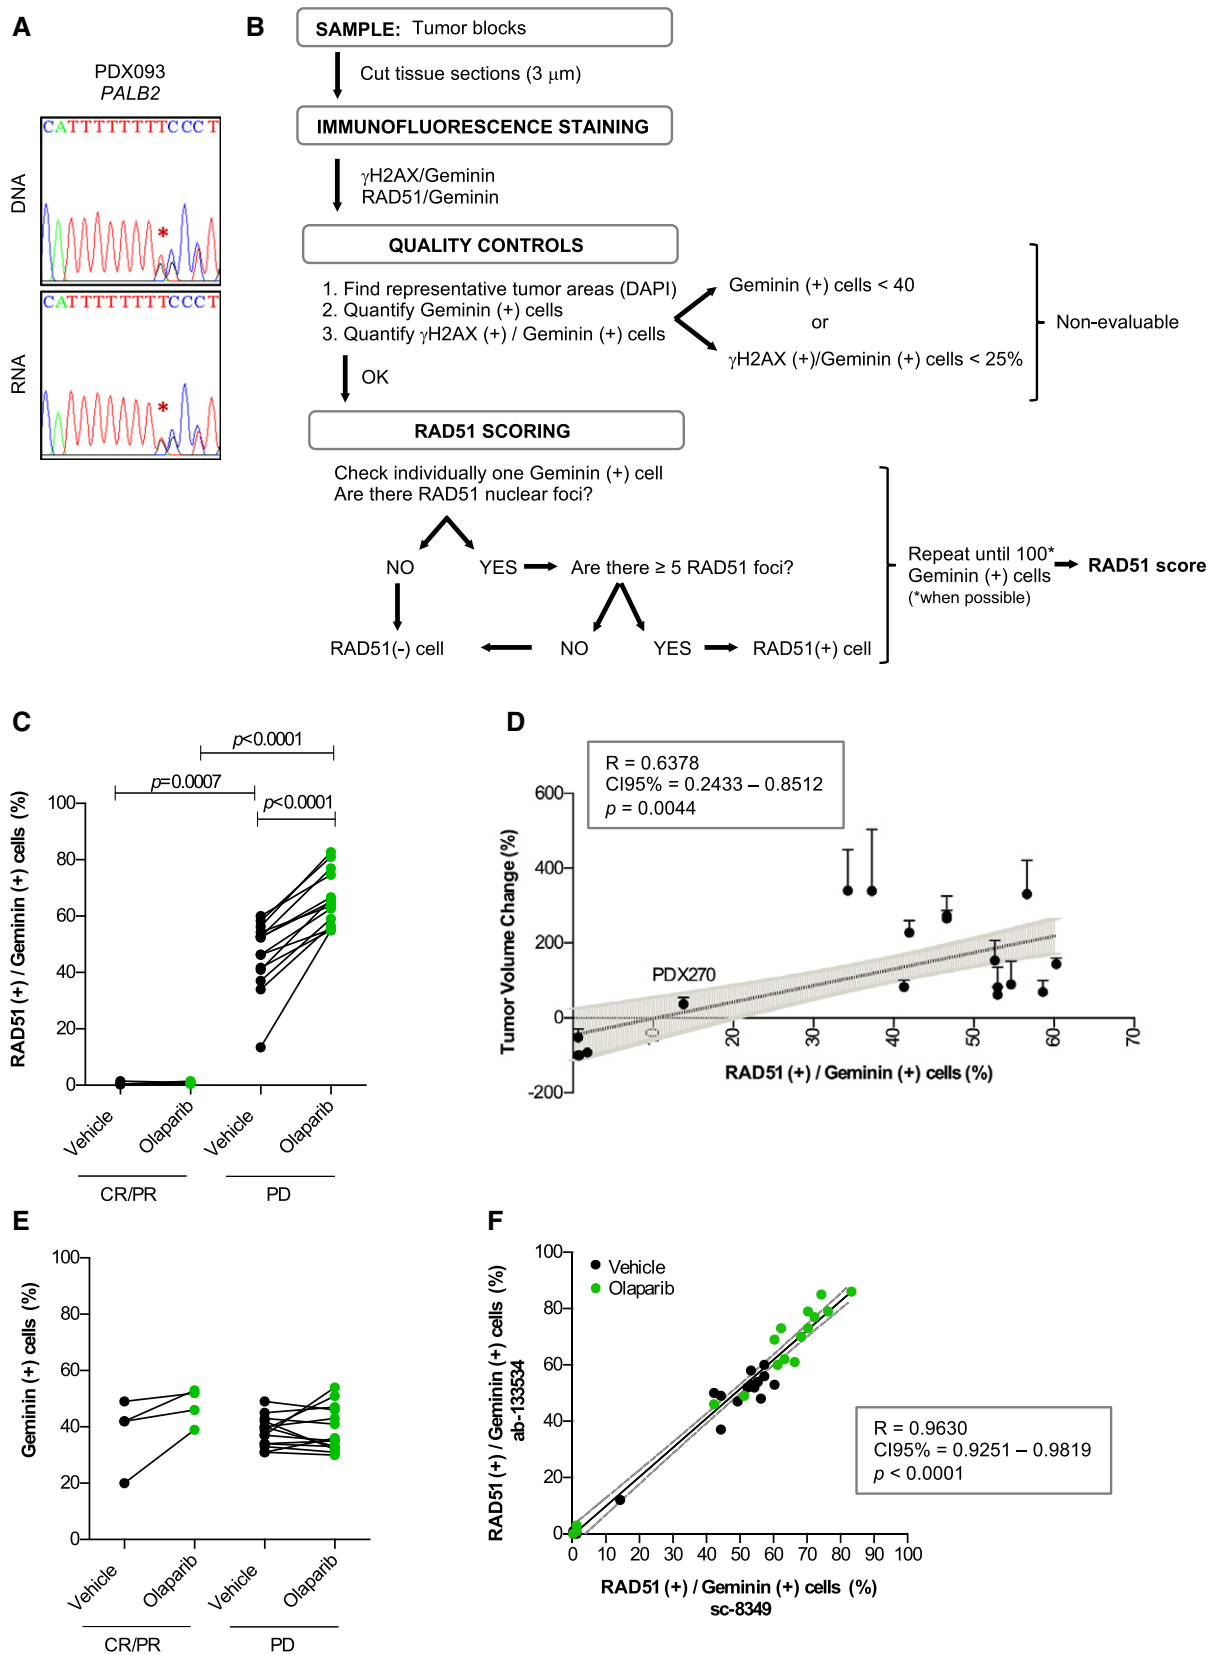

Figure EV1.
